# Supplementary material
Source: PubMed Central journal article supplement (PMC6013840)

1014 Appendix I. Results of tests on the acute toxicity of major ion salts, gluconate salts, and mannitol to *Ceriodaphnia dubia* in various tests waters; see text for  
 1015 designations and formulations for test and culture waters; horizontal lines delineate experiments and experimental sets. For LC50s, “Probit” denotes exposure-  
 1016 effects curve calculation by probit method; “Midpoint” denotes geometric mean of confidence limits; parentheses denote confidence limits; see text for  
 1017 methodology. Except where noted, LC50s and component concentrations are nominal, and expected to be within +/-10% based on analysis of subset of test  
 1018 solutions

| Set # | Test Chemical                   | Culture Water | Test Water  | LC50 Method      | LC50 mg/L (≥95% CL) | LC50 mM (≥95% CL) | Na mM | K mM  | Ca mM | Mg mM | Cl mM | SO4 mM | Alk meq/L | pH   | LC50 μS/cm | Osmol mOsM |
|-------|---------------------------------|---------------|-------------|------------------|---------------------|-------------------|-------|-------|-------|-------|-------|--------|-----------|------|------------|------------|
| 1     | NaCl                            | MHRW          | 0.33x MHRW  | Midpoint         | 1860 (1740-1990)    | 31.8 (29.8-34.0)  | 32.2  | 0.02  | 0.116 | 0.16  | 31.8  | 0.28   | 0.38      | 7.40 | 3170       | 61.4       |
|       | NaCl                            | MHRW          | MHRW        | Probit           | 2060 (2020-2490)    | 35.3 (34.5-42.6)  | 36.5  | 0.05  | 0.348 | 0.50  | 35.4  | 0.84   | 1.14      | 7.90 | 3500       | 70.1       |
|       | Na <sub>2</sub> SO <sub>4</sub> | MHRW          | 0.33x MHRW  | Midpoint         | 1860 (1730-2010)    | 13.1 (12.2-14.2)  | 26.6  | 0.02  | 0.116 | 0.16  | 0.02  | 13.4   | 0.38      | 7.60 | 2480       | 35.7       |
|       | Na <sub>2</sub> SO <sub>4</sub> | MHRW          | MHRW        | Probit           | 3060 (2810-3350)    | 21.5 (19.8-23.6)  | 44.2  | 0.05  | 0.348 | 0.50  | 0.05  | 22.4   | 1.14      | 8.00 | 3680       | 58.7       |
|       | NaCl                            | ALSW          | ALSW        | Midpoint         | 1680 (1560-1790)    | 28.7 (26.8-30.7)  | 28.9  | 0.04  | 0.364 | 0.17  | 28.9  | 0.16   | 0.86      | 7.95 | 2980       | 56.1       |
|       | NaCl                            | ALSW          | 0.33x ALSW  | Probit           | 1560 (1420-1720)    | 26.7 (24.4-29.4)  | 26.8  | 0.01  | 0.121 | 0.06  | 26.8  | 0.05   | 0.29      | 7.55 | 2700       | 51.3       |
|       | NaCl                            | 0.33x ALSW    | 0.33x ALSW  | Probit           | 1770 (1580-1980)    | 30.2 (27.0-33.9)  | 30.3  | 0.01  | 0.121 | 0.06  | 30.3  | 0.05   | 0.29      | 7.55 | 3030       | 57.9       |
|       | NaCl                            | 0.33x ALSW    | ALSW        | Probit           | 1940 (1780-2110)    | 33.2 (30.5-36.2)  | 33.5  | 0.04  | 0.364 | 0.17  | 33.4  | 0.16   | 0.86      | 7.90 | 3180       | 64.5       |
|       | NaCl                            | MHRW          | MHRW        | Probit           | 1810 (1680-1950)    | 31.0 (28.8-33.4)  | 32.1  | 0.05  | 0.348 | 0.50  | 31.0  | 0.84   | 1.14      | 8.00 | 3310       | 62.0       |
|       | NaCl                            | 0.33x MHRW    | 0.33x MHRW  | Midpoint         | 1640 (1530-1760)    | 28.1 (26.2-30.1)  | 28.4  | 0.02  | 0.116 | 0.16  | 28.1  | 0.28   | 0.38      | 7.60 | 2990       | 54.4       |
|       | NaCl                            | 0.33x MHRW    | 0.33x MHRW  | Probit           | 1560 (1440-1710)    | 26.7 (24.6-29.2)  | 27.1  | 0.02  | 0.116 | 0.16  | 26.8  | 0.28   | 0.38      | 7.70 | 2770       | 51.9       |
|       | NaCl                            | MHRW          | 0.33x MHRW  | Probit           | 1480 (1340-1640)    | 25.3 (23.0-28.1)  | 25.7  | 0.02  | 0.116 | 0.16  | 25.4  | 0.28   | 0.38      | 7.70 | 2690       | 49.3       |
|       | MgCl <sub>2</sub>               | 0.33x ALSW    | 0.33x ALSW  | Probit           | 529 (457-612)       | 5.56 (4.80-6.43)  | 0.09  | 0.01  | 0.121 | 5.61  | 11.2  | 0.05   | 0.29      | 7.45 | 1230       | 15.9       |
|       | MgCl <sub>2</sub>               | ALSW          | 0.33x ALSW  | Probit           | 667 (556-810)       | 7.01 (5.84-8.51)  | 0.09  | 0.01  | 0.121 | 7.06  | 14.1  | 0.05   | 0.29      | 7.45 | 1510       | 19.7       |
|       | MgCl <sub>2</sub>               | MHRW          | 0.33x MHRW  | Probit           | 305 (271-338)       | 3.20 (2.85-3.55)  | 0.38  | 0.02  | 0.116 | 3.37  | 6.42  | 0.28   | 0.38      | 7.55 | 813        | 10.2       |
|       | MgCl <sub>2</sub>               | 0.33x MHRW    | 0.33x MHRW  | Probit           | 312 (192-417)       | 3.28 (2.02-4.38)  | 0.38  | 0.02  | 0.116 | 3.44  | 6.57  | 0.28   | 0.38      | 7.60 | 835        | 10.3       |
|       | NaCl                            | 0.125x MHRW   | 0.125x MHRW | Midpoint         | 907 (828-993)       | 15.5 (14.2-17.0)  | 15.7  | 0.01  | 0.044 | 0.06  | 15.5  | 0.11   | 0.14      | 7.45 | 1750       | 31.0       |
|       | NaCl                            | 0.125x MHRW   | MHRW        | Midpoint         | 1810 (1640-1990)    | 30.9 (28.1-34.0)  | 32.0  | 0.05  | 0.348 | 0.50  | 31.0  | 0.84   | 1.14      | 8.05 | 3260       | 61.9       |
| NaCl  | MHRW                            | 0.125x MHRW   | Midpoint    | 1010 (940-1080)  | 17.2 (16.1-18.4)    | 17.3              | 0.01  | 0.044 | 0.06  | 17.2  | 0.11  | 0.14   | 7.35      | 1860 | 34.1       |            |
| NaCl  | MHRW                            | MHRW          | Probit      | 1710 (1580-1850) | 29.3 (27.1-31.7)    | 30.4              | 0.05  | 0.348 | 0.50  | 29.4  | 0.84  | 1.14   | 8.05      | 3040 | 58.9       |            |

|                   |                                 |             |             |               |                  |                  |      |       |       |      |      |       |      |      |      |      |
|-------------------|---------------------------------|-------------|-------------|---------------|------------------|------------------|------|-------|-------|------|------|-------|------|------|------|------|
| 2                 | MgCl <sub>2</sub>               | 0.125x MHRW | 0.125x MHRW | Probit        | 69 (53-90)       | 0.72 (0.56-0.95) | 0.14 | 0.01  | 0.044 | 0.79 | 1.46 | 0.11  | 0.14 | 7.25 | 229  | 3.3  |
|                   | MgCl <sub>2</sub>               | MHRW        | 0.125x MHRW | Probit        | 116 (94-202)     | 1.22 (0.99-2.12) | 0.14 | 0.01  | 0.044 | 1.28 | 2.44 | 0.11  | 0.14 | 7.25 | 351  | 8.8  |
|                   | Na <sub>2</sub> SO <sub>4</sub> | 0.125x MHRW | 0.125x MHRW | Midpoint      | 671 (613-734)    | 4.72 (4.32-5.17) | 9.59 | 0.01  | 0.044 | 0.06 | 0.01 | 4.83  | 0.14 | 7.40 | 1070 | 14.2 |
|                   | Na <sub>2</sub> SO <sub>4</sub> | MHRW        | 0.125x MHRW | Midpoint      | 916 (829-1012)   | 6.45 (5.84-7.12) | 13.0 | 0.01  | 0.044 | 0.06 | 0.01 | 6.55  | 0.14 | 7.20 | 1360 | 18.8 |
|                   | MgSO <sub>4</sub>               | 0.125x MHRW | 0.125x MHRW | Probit        | 160 (137-184)    | 1.33 (1.14-1.53) | 0.14 | 0.01  | 0.044 | 1.39 | 0.01 | 1.43  | 0.14 | 7.05 | 630  | 3.6  |
|                   | MgSO <sub>4</sub>               | MHRW        | 0.125x MHRW | Probit        | 291 (264-321)    | 2.42 (2.19-2.67) | 0.14 | 0.01  | 0.044 | 2.48 | 0.01 | 2.52  | 0.14 | 7.20 | 978  | 5.2  |
|                   | KCl                             | 0.125x MHRW | 0.125x MHRW | Probit        | 177 (159-197)    | 2.37 (2.13-2.64) | 0.14 | 2.38  | 0.044 | 0.06 | 2.38 | 0.11  | 0.14 | 7.40 | 389  | 5.9  |
|                   | KCl                             | MHRW        | 0.125x MHRW | Midpoint      | 224 (204-245)    | 3.0 (2.74-3.29)  | 0.14 | 3.01  | 0.044 | 0.06 | 3.01 | 0.11  | 0.14 | 7.40 | 474  | 7.1  |
|                   | NaHCO <sub>3</sub>              | 0.125x MHRW | 0.125x MHRW | Midpoint      | 1070 (1000-1140) | 12.7 (11.9-13.6) | 12.9 | 0.01  | 0.044 | 0.06 | 0.01 | 0.11  | 12.9 | 9.20 | 1110 | 23.8 |
|                   | NaHCO <sub>3</sub>              | MHRW        | 0.125x MHRW | Midpoint      | 1000 (920-1090)  | 11.9 (10.9-13.0) | 12.0 | 0.01  | 0.044 | 0.06 | 0.01 | 0.11  | 12.0 | 9.15 | 1060 | 22.4 |
|                   | CaCl <sub>2</sub>               | 0.125x MHRW | 0.125x MHRW | Midpoint      | 1670 (1570-1780) | 15.1 (14.2-16.1) | 0.14 | 0.01  | 15.1  | 0.06 | 30.2 | 0.11  | 0.14 | 6.90 | 2930 | 41.2 |
|                   | CaCl <sub>2</sub>               | MHRW        | 0.125x MHRW | Probit        | 1660 (1620-1940) | 15.0 (14.6-17.5) | 0.14 | 0.01  | 15.0  | 0.06 | 30.0 | 0.11  | 0.14 | 6.95 | 2920 | 40.9 |
| 3                 | KCl                             | MHRW        | ALSW        | Probit        | 351 (321-384)    | 4.71 (4.31-5.15) | 0.28 | 4.75  | 0.364 | 0.17 | 4.92 | 0.16  | 0.86 | 7.95 | 781  | 11.1 |
|                   | KCl                             | MHRW        | MHRW        | Probit        | 464 (395-568)    | 6.22 (5.30-7.62) | 1.14 | 6.28  | 0.348 | 0.50 | 6.28 | 0.84  | 1.14 | 8.10 | 1140 | 15.7 |
|                   | CaCl <sub>2</sub>               | MHRW        | ALSW        | Probit        | 1900 (1690-2170) | 17.2 (15.2-19.5) | 0.28 | 0.04  | 17.5  | 0.17 | 34.5 | 0.16  | 0.86 | 7.90 | 3220 | 46.9 |
|                   | CaCl <sub>2</sub>               | MHRW        | MHRW        | Probit        | 1990 (1760-2260) | 18.0 (15.9-20.4) | 1.14 | 0.05  | 18.3  | 0.50 | 36.0 | 0.84  | 1.14 | 7.95 | 3250 | 50.3 |
|                   | MgCl <sub>2</sub>               | MHRW        | ALSW        | Probit        | 861 (759-981)    | 9.04 (7.97-10.3) | 0.28 | 0.04  | 0.364 | 9.21 | 18.3 | 0.16  | 0.86 | 7.85 | 1900 | 26.1 |
|                   | MgCl <sub>2</sub>               | MHRW        | MHRW        | Probit        | 733 (615-895)    | 7.70 (6.46-9.40) | 1.14 | 0.05  | 0.348 | 8.19 | 15.4 | 0.84  | 1.14 | 7.95 | 1730 | 24.2 |
|                   | K <sub>2</sub> SO <sub>4</sub>  | MHRW        | ALSW        | Midpoint      | 362 (339-386)    | 2.08 (1.95-2.22) | 0.28 | 4.19  | 0.364 | 0.17 | 0.22 | 2.23  | 0.86 | 7.90 | 690  | 7.7  |
|                   | K <sub>2</sub> SO <sub>4</sub>  | MHRW        | MHRW        | Midpoint      | 606 (557-659)    | 3.48 (3.20-3.78) | 1.14 | 7.01  | 0.348 | 0.50 | 0.05 | 4.32  | 1.14 | 8.05 | 1150 | 13.2 |
|                   | Na <sub>2</sub> SO <sub>4</sub> | MHRW        | ALSW        | Midpoint      | 3410 (3150-3700) | 24.0 (22.2-26.0) | 48.3 | 0.04  | 0.364 | 0.17 | 0.22 | 24.18 | 0.86 | 7.90 | 4080 | 63.4 |
|                   | Na <sub>2</sub> SO <sub>4</sub> | MHRW        | MHRW        | Midpoint      | 3260 (3060-3460) | 22.9 (21.5-24.4) | 47.0 | 0.05  | 0.348 | 0.50 | 0.05 | 23.76 | 1.14 | 8.00 | 3970 | 62.2 |
|                   | MgSO <sub>4</sub>               | MHRW        | ALSW        | Probit        | 2040 (1880-2230) | 16.9 (15.6-18.5) | 0.28 | 0.04  | 0.364 | 17.1 | 0.22 | 17.10 | 0.86 | 7.85 | 2240 | 25.2 |
|                   | MgSO <sub>4</sub>               | MHRW        | MHRW        | Probit        | 1990 (1830-2180) | 16.6 (15.2-18.1) | 1.14 | 0.05  | 0.348 | 17.1 | 0.05 | 17.4  | 1.14 | 8.00 | 2280 | 26.3 |
| KHCO <sub>3</sub> | MHRW                            | ALSW        | Probit      | 322 (306-340) | 3.22 (3.06-3.40) | 0.28             | 3.25 | 0.364 | 0.17  | 0.22 | 0.16 | 4.08  | 8.70 | 487  | 8.0  |      |

|   |                                 |      |            |          |                  |                  |      |      |                          |      |      |      |      |      |      |      |
|---|---------------------------------|------|------------|----------|------------------|------------------|------|------|--------------------------|------|------|------|------|------|------|------|
|   | KHCO <sub>3</sub>               | MHRW | MHRW       | Probit   | 454 (407-507)    | 4.53 (4.07-5.06) | 1.14 | 4.59 | 0.348                    | 0.50 | 0.05 | 0.84 | 5.68 | 8.85 | 844  | 13.3 |
|   | NaHCO <sub>3</sub>              | MHRW | ALSW       | Midpoint | 1980 (1880-2090) | 23.6 (22.3-24.9) | 23.8 | 0.04 | <b>0.187<sup>a</sup></b> | 0.17 | 0.22 | 0.16 | 24.4 | 9.35 | 1940 | 41.7 |
|   | NaHCO <sub>3</sub>              | MHRW | MHRW       | Probit   | 1610 (1440-1700) | 19.1 (17.2-20.3) | 20.3 | 0.05 | <b>0.141<sup>a</sup></b> | 0.50 | 0.05 | 0.84 | 20.3 | 9.25 | 1680 | 36.6 |
|   | NaCl                            | MHRW | ALSW       | Probit   | 1910 (1730-2110) | 32.7 (29.6-36.1) | 33.0 | 0.04 | 0.364                    | 0.17 | 32.9 | 0.16 | 0.86 | 8.00 | 3110 | 63.6 |
|   | NaCl                            | MHRW | MHRW       | Midpoint | 2000 (1830-2190) | 34.3 (31.4-37.5) | 35.4 | 0.05 | 0.348                    | 0.50 | 34.4 | 0.84 | 1.14 | 8.10 | 3470 | 68.1 |
|   | MgCO <sub>3</sub>               | MHRW | ALSW       | Midpoint | 906 (859-956)    | 10.8 (10.2-11.3) | 0.28 | 0.04 | 0.443                    | 10.9 | 0.22 | 0.16 | 22.4 | 9.25 | 1160 | 23.2 |
|   | MgCO <sub>3</sub>               | MHRW | MHRW       | Midpoint | 892 (848-938)    | 10.6 (10.1-11.1) | 1.14 | 0.05 | 0.426                    | 11.1 | 0.05 | 0.84 | 22.3 | 9.25 | 1230 | 25.2 |
| 4 | NaHCO <sub>3</sub>              | MHRW | 0.33x ALSW | Midpoint | 1950 (1780-2130) | 23.2 (21.2-25.4) | 23.3 | 0.01 | 0.121                    | 0.06 | 0.07 | 0.05 | 23.5 | 9.30 | 1800 | 40.3 |
|   | NaHCO <sub>3</sub>              | MHRW | 3.0x ALSW  | Probit   | 1710 (1560-1890) | 20.4 (18.6-22.5) | 21.2 | 0.12 | <b>0.231<sup>a</sup></b> | 0.50 | 0.65 | 0.47 | 23.0 | 9.35 | 1800 | 39.1 |
|   | NaCl                            | MHRW | 0.33x ALSW | Midpoint | 1640 (1530-1760) | 28.1 (26.2-30.0) | 28.2 | 0.01 | 0.121                    | 0.06 | 28.1 | 0.05 | 0.29 | 7.40 | 2700 | 53.9 |
|   | NaCl                            | MHRW | 3.0x ALSW  | Probit   | 1980 (1770-2160) | 33.8 (30.2-36.9) | 34.7 | 0.12 | 1.093                    | 0.50 | 34.5 | 0.47 | 2.58 | 8.30 | 3490 | 69.1 |
|   | Na <sub>2</sub> SO <sub>4</sub> | MHRW | 0.33x ALSW | Probit   | 1940 (1770-2100) | 13.6 (12.5-14.8) | 27.3 | 0.01 | 0.121                    | 0.06 | 0.07 | 13.7 | 0.29 | 7.55 | 2480 | 36.5 |
|   | Na <sub>2</sub> SO <sub>4</sub> | MHRW | 3.0x ALSW  | Midpoint | 3350 (3140-3570) | 23.6 (22.1-25.2) | 23.8 | 0.12 | 1.093                    | 0.50 | 0.65 | 0.47 | 2.58 | 8.45 | 4090 | 65.4 |
|   | KCl                             | MHRW | 0.33x ALSW | Midpoint | 192 (180-205)    | 2.58 (2.41-2.75) | 0.09 | 2.59 | 0.121                    | 0.06 | 2.65 | 0.05 | 0.29 | 7.65 | 430  | 5.7  |
|   | KCl                             | MHRW | 3.0x ALSW  | Probit   | 481 (432-534)    | 6.45 (5.79-7.16) | 0.85 | 6.57 | 1.093                    | 0.50 | 7.10 | 0.47 | 2.58 | 8.45 | 1220 | 18.1 |
|   | MgSO <sub>4</sub>               | MHRW | 0.33x ALSW | Midpoint | 1590 (1440-1770) | 13.2 (11.9-14.7) | 0.09 | 0.01 | 0.121                    | 13.3 | 0.07 | 13.3 | 0.29 | 7.45 | 1780 | 19.4 |
|   | MgSO <sub>4</sub>               | MHRW | 3.0x ALSW  | Midpoint | 2860 (2620-3130) | 23.8 (21.7-26.0) | 0.85 | 0.12 | 1.093                    | 24.3 | 0.65 | 24.2 | 2.58 | 8.35 | 2910 | 36.9 |
|   | MgCl <sub>2</sub>               | MHRW | 0.33x ALSW | Probit   | 374 (344-409)    | 3.93 (3.61-4.30) | 0.09 | 0.01 | 0.121                    | 3.98 | 7.93 | 0.05 | 0.29 | 7.25 | 910  | 11.6 |
|   | MgCl <sub>2</sub>               | MHRW | 3.0x ALSW  | Probit   | 1290 (1160-1490) | 13.6 (12.2-15.7) | 0.85 | 0.12 | 1.093                    | 14.0 | 27.8 | 0.47 | 2.58 | 8.35 | 2760 | 40.8 |
|   | CaCl <sub>2</sub>               | ALSW | 0.3x ALSW  | Midpoint | 1600 (1490-1710) | 14.4 (13.4-15.4) | 0.09 | 0.01 | 14.5                     | 0.06 | 28.8 | 0.05 | 0.29 | 7.35 | 2870 | 38.7 |
|   | CaCl <sub>2</sub>               | ALSW | 3.0x ALSW  | Midpoint | 2000 (1870-2130) | 18.0 (16.9-19.2) | 0.85 | 0.12 | 19.1                     | 0.50 | 36.7 | 0.47 | 2.58 | 7.95 | 3510 | 52.4 |
|   | K <sub>2</sub> SO <sub>4</sub>  | ALSW | 0.3x ALSW  | Probit   | 234 (215-254)    | 1.34 (1.23-1.46) | 0.09 | 2.70 | 0.121                    | 0.06 | 0.07 | 1.39 | 0.29 | 7.40 | 426  | 4.5  |
|   | K <sub>2</sub> SO <sub>4</sub>  | ALSW | 3.0x ALSW  | Midpoint | 518 (449-598)    | 2.97 (2.58-3.43) | 0.85 | 6.06 | 1.093                    | 0.50 | 0.65 | 3.44 | 2.58 | 8.50 | 1120 | 13.7 |
|   | MgCO <sub>3</sub>               | ALSW | 0.3x ALSW  | Midpoint | 390 (365-417)    | 4.63 (4.33-4.95) | 0.09 | 0.01 | 0.155                    | 4.68 | 0.07 | 0.05 | 9.54 | 8.95 | 619  | 11.8 |
|   | MgCO <sub>3</sub>               | ALSW | 3.0x ALSW  | Midpoint | 977 (916-1041)   | 11.6 (10.9-12.4) | 0.85 | 0.12 | <b>0.318<sup>a</sup></b> | 12.1 | 0.65 | 0.47 | 25.8 | 9.15 | 1280 | 28.9 |

|   |                                 |      |                        |          |                  |                  |      |      |                          |      |      |      |      |      |      |      |
|---|---------------------------------|------|------------------------|----------|------------------|------------------|------|------|--------------------------|------|------|------|------|------|------|------|
|   | NaCl                            | ALSW | 0.33x ALSW             | Midpoint | 1700 (1600-1800) | 29.1 (27.4-30.9) | 29.2 | 0.01 | 0.121                    | 0.06 | 29.1 | 0.05 | 0.29 | 7.50 | 2960 | 55.7 |
|   | NaCl                            | ALSW | ALSW                   | Probit   | 1910 (1760-2070) | 32.6 (30.1-35.4) | 32.9 | 0.04 | 0.364                    | 0.17 | 32.8 | 0.16 | 0.86 | 7.90 | 3320 | 63.5 |
|   | NaCl                            | ALSW | 3.0x ALSW              | Midpoint | 2420 (2210-2660) | 41.5 (37.8-45.5) | 42.3 | 0.12 | 1.093                    | 0.50 | 42.1 | 0.47 | 2.58 | 8.40 | 4110 | 83.1 |
|   | Na <sub>2</sub> SO <sub>4</sub> | ALSW | 0.33x ALSW             | Midpoint | 1890 (1760-2020) | 13.3 (12.4-14.2) | 26.7 | 0.01 | 0.121                    | 0.06 | 0.07 | 13.4 | 0.29 | 7.55 | 2480 | 35.7 |
|   | Na <sub>2</sub> SO <sub>4</sub> | ALSW | ALSW                   | Midpoint | 3440 (3220-3670) | 24.2 (22.6-25.8) | 48.7 | 0.04 | 0.364                    | 0.17 | 0.22 | 24.4 | 0.86 | 7.95 | 4000 | 63.8 |
|   | Na <sub>2</sub> SO <sub>4</sub> | ALSW | 3.0x ALSW              | Probit   | 3520 (3200-3880) | 24.8 (22.5-27.3) | 50.4 | 0.12 | 1.093                    | 0.50 | 0.65 | 25.3 | 2.58 | 8.50 | 4280 | 68.5 |
| 5 | NaCl                            | MHRW | Low Ca:Mg              | Midpoint | 1580 (1420-1740) | 27.0 (24.3-29.8) | 27.2 | 0.04 | 0.075                    | 0.46 | 27.2 | 0.15 | 0.86 | 7.90 | 2790 | 53.0 |
|   | NaCl                            | MHRW | HighCa:Mg              | Midpoint | 1920 (1790-2050) | 32.8 (30.7-35.0) | 33.1 | 0.04 | 0.475                    | 0.06 | 33.0 | 0.15 | 0.86 | 7.90 | 3218 | 63.8 |
|   | NaHCO <sub>3</sub>              | MHRW | Low Ca:Mg              | Midpoint | 1540 (1440-1640) | 18.3 (17.2-19.5) | 18.6 | 0.04 | 0.075                    | 0.46 | 0.22 | 0.15 | 19.2 | 9.25 | 1611 | 33.8 |
|   | NaHCO <sub>3</sub>              | MHRW | HighCa:Mg              | Midpoint | 2000 (1870-2140) | 23.8 (22.2-25.5) | 24.1 | 0.04 | <b>0.200<sup>a</sup></b> | 0.06 | 0.22 | 0.15 | 24.6 | 9.30 | 1970 | 41.2 |
|   | Na <sub>2</sub> SO <sub>4</sub> | MHRW | Low Ca:Mg              | Probit   | 1430 (1340-1560) | 10.1 (9.41-11.0) | 20.4 | 0.04 | 0.075                    | 0.46 | 0.22 | 10.2 | 0.86 | 7.95 | 2027 | 28.6 |
|   | Na <sub>2</sub> SO <sub>4</sub> | MHRW | HighCa:Mg              | Midpoint | 3140 (2940-3360) | 22.1 (20.7-23.6) | 44.5 | 0.04 | 0.475                    | 0.06 | 0.22 | 22.3 | 0.86 | 8.00 | 3822 | 58.7 |
|   | KCl                             | MHRW | Low Ca:Mg              | Midpoint | 245 (229-263)    | 3.29 (3.07-3.53) | 0.28 | 3.32 | 0.075                    | 0.46 | 3.50 | 0.15 | 0.86 | 7.95 | 626  | 8.4  |
|   | KCl                             | MHRW | HighCa:Mg              | Midpoint | 281 (258-306)    | 3.77 (3.46-4.10) | 0.28 | 3.81 | 0.475                    | 0.06 | 3.99 | 0.15 | 0.86 | 7.95 | 663  | 9.3  |
|   | MgSO <sub>4</sub>               | MHRW | Low Ca:Mg              | Probit   | 935 (857-1020)   | 7.77 (7.12-8.52) | 0.28 | 0.04 | 0.075                    | 8.23 | 0.22 | 7.92 | 0.86 | 7.90 | 1292 | 13.3 |
|   | MgSO <sub>4</sub>               | MHRW | HighCa:Mg              | Midpoint | 2060 (1920-2200) | 17.1 (15.9-18.3) | 0.28 | 0.04 | 0.475                    | 17.1 | 0.22 | 17.2 | 0.86 | 7.95 | 2232 | 25.4 |
|   | MgCl <sub>2</sub>               | MHRW | Low Ca:Mg              | Probit   | 223 (203-245)    | 2.34 (2.13-2.57) | 0.28 | 0.04 | 0.075                    | 2.80 | 4.90 | 0.15 | 0.86 | 7.90 | 654  | 8.5  |
|   | MgCl <sub>2</sub>               | MHRW | HighCa:Mg              | Probit   | 935 (865-1015)   | 9.82 (9.09-10.7) | 0.28 | 0.04 | 0.475                    | 9.88 | 19.9 | 0.15 | 0.86 | 7.90 | 2041 | 28.1 |
| 6 | Na <sub>2</sub> SO <sub>4</sub> | MHRW | Low Cl:SO <sub>4</sub> | Midpoint | 3430 (3200-3670) | 24.1 (22.5-25.8) | 48.5 | 0.04 | 0.365                    | 0.17 | 0.04 | 24.3 | 0.86 | 8.00 | 4001 | 63.5 |
|   | Na <sub>2</sub> SO <sub>4</sub> | MHRW | HighCl:SO <sub>4</sub> | Probit   | 2990 (2770-3250) | 21.1 (19.5-22.9) | 42.4 | 0.04 | 0.365                    | 0.17 | 0.40 | 21.1 | 0.86 | 7.95 | 3632 | 56.2 |
|   | K <sub>2</sub> SO <sub>4</sub>  | MHRW | Low Cl:SO <sub>4</sub> | Midpoint | 377 (355-401)    | 2.16 (2.04-2.30) | 0.28 | 4.37 | 0.365                    | 0.17 | 0.04 | 2.38 | 0.86 | 8.00 | 710  | 7.8  |
|   | K <sub>2</sub> SO <sub>4</sub>  | MHRW | HighCl:SO <sub>4</sub> | Midpoint | 349 (322-379)    | 2.00 (1.85-2.17) | 0.28 | 4.04 | 0.365                    | 0.17 | 0.40 | 2.04 | 0.86 | 8.00 | 669  | 7.6  |
|   | MgSO <sub>4</sub>               | MHRW | Low Cl:SO <sub>4</sub> | Midpoint | 1980 (1800-2170) | 16.4 (15.0-18.0) | 0.28 | 0.04 | 0.365                    | 16.6 | 0.04 | 16.6 | 0.86 | 7.90 | 2172 | 24.4 |
|   | MgSO <sub>4</sub>               | MHRW | HighCl:SO <sub>4</sub> | Probit   | 1860 (1670-2080) | 15.5 (13.9-17.3) | 0.28 | 0.04 | 0.365                    | 15.6 | 0.40 | 15.5 | 0.86 | 7.90 | 2097 | 23.4 |
|   | NaHCO <sub>3</sub>              | MHRW | Low Cl:SO <sub>4</sub> | Probit   | 1990 (1830-2180) | 23.7 (21.8-26.0) | 24.0 | 0.04 | <b>0.190<sup>a</sup></b> | 0.17 | 0.04 | 0.22 | 24.6 | 9.35 | 1927 | 41.9 |

|   |                                 |      |               |          |                  |                  |      |      |                          |      |      |      |      |      |      |      |
|---|---------------------------------|------|---------------|----------|------------------|------------------|------|------|--------------------------|------|------|------|------|------|------|------|
|   | NaHCO <sub>3</sub>              | MHRW | HighCl:SO4    | Midpoint | 2050 (1910-2200) | 24.4 (22.8-26.1) | 24.7 | 0.04 | <b>0.166<sup>a</sup></b> | 0.17 | 0.40 | 0.04 | 25.2 | 9.35 | 2003 | 42.2 |
|   | NaCl                            | MHRW | Low Cl:SO4    | Probit   | 1660 (1500-1840) | 28.4 (25.7-31.5) | 28.7 | 0.04 | 0.365                    | 0.17 | 28.4 | 0.22 | 0.86 | 7.95 | 2816 | 55.5 |
|   | NaCl                            | MHRW | HighCl:SO4    | Midpoint | 1700 (1600-1800) | 29.1 (27.4-30.9) | 29.4 | 0.04 | 0.365                    | 0.17 | 29.5 | 0.04 | 0.86 | 7.90 | 2921 | 57.0 |
|   | MgCO <sub>3</sub>               | MHRW | Low Cl:SO4    | Probit   | 948 (874-1030)   | 11.2 (10.4-12.2) | 0.28 | 0.04 | 0.447                    | 11.4 | 0.04 | 0.22 | 23.4 | 9.20 | 1149 | 24.7 |
|   | MgCO <sub>3</sub>               | MHRW | HighCl:SO4    | Midpoint | 894 (836-957)    | 10.6 (9.92-11.4) | 0.28 | 0.04 | 0.442                    | 10.8 | 0.40 | 0.04 | 22.1 | 9.20 | 1131 | 23.8 |
| 7 | NaCl                            | ALSW | Low K ALSW    | Midpoint | 1920 (1800-2040) | 32.8 (30.9-35.0) | 33.2 | 0.01 | 0.364                    | 0.17 | 33.2 | 0.16 | 0.86 | 7.85 | 3110 | 63.9 |
|   | NaCl                            | ALSW | High K ALSW   | Probit   | 1980 (1830-2160) | 34.0 (31.3-37.0) | 34.0 | 0.26 | 0.364                    | 0.17 | 34.1 | 0.16 | 0.86 | 7.85 | 3216 | 66.0 |
|   | Na <sub>2</sub> SO <sub>4</sub> | ALSW | Low K ALSW    | Probit   | 2920 (2650-3230) | 20.6 (18.7-22.8) | 41.5 | 0.01 | 0.364                    | 0.17 | 0.22 | 20.8 | 0.86 | 7.90 | 3351 | 54.9 |
|   | Na <sub>2</sub> SO <sub>4</sub> | ALSW | High K ALSW   | Probit   | 3420 (3140-3730) | 24.0 (22.1-26.3) | 48.2 | 0.26 | 0.364                    | 0.17 | 0.22 | 24.2 | 0.86 | 7.85 | 3858 | 63.5 |
|   | NaHCO <sub>3</sub>              | ALSW | Low K ALSW    | Midpoint | 2090 (1960-2220) | 24.8 (23.3-26.5) | 25.2 | 0.01 | <b>0.139<sup>a</sup></b> | 0.17 | 0.22 | 0.16 | 25.7 | 9.35 | 1867 | 43.8 |
|   | NaHCO <sub>3</sub>              | ALSW | High K ALSW   | Midpoint | 2220 (2010-2450) | 26.4 (23.9-29.1) | 26.5 | 0.26 | <b>0.192<sup>a</sup></b> | 0.17 | 0.22 | 0.16 | 27.2 | 9.35 | 2007 | 46.2 |
|   | CaCl <sub>2</sub>               | ALSW | Low K ALSW    | Probit   | 1870 (1690-2050) | 16.9 (15.2-18.5) | 0.33 | 0.01 | 17.2                     | 0.17 | 34.0 | 0.16 | 0.86 | 7.90 | 3168 | 46.2 |
|   | CaCl <sub>2</sub>               | ALSW | High K ALSW   | Probit   | 1710 (1550-1880) | 15.4 (14.0-17.0) | 0.08 | 0.26 | 15.8                     | 0.17 | 31.1 | 0.16 | 0.86 | 7.85 | 2942 | 42.5 |
|   | MgCl <sub>2</sub>               | ALSW | Low K ALSW    | Probit   | 970 (853-1103)   | 10.2 (8.96-11.6) | 0.33 | 0.01 | 0.364                    | 10.4 | 20.6 | 0.16 | 0.86 | 7.85 | 2022 | 29.1 |
|   | MgCl <sub>2</sub>               | ALSW | High K ALSW   | Probit   | 912 (794-1050)   | 9.58 (8.34-11.0) | 0.08 | 0.26 | 0.364                    | 9.75 | 19.4 | 0.16 | 0.86 | 7.90 | 1968 | 27.5 |
|   | MgSO <sub>4</sub>               | ALSW | Low K ALSW    | Probit   | 2030 (1790-2300) | 16.8 (14.9-19.1) | 0.33 | 0.01 | 0.364                    | 17.0 | 0.22 | 17.0 | 0.86 | 7.95 | 2232 | 25.1 |
|   | MgSO <sub>4</sub>               | ALSW | High K ALSW   | Probit   | 2240 (1980-2470) | 18.6 (16.5-20.5) | 0.08 | 0.26 | 0.364                    | 18.8 | 0.22 | 18.8 | 0.86 | 8.00 | 2329 | 27.3 |
| 8 | KCl                             | MHRW | Low Alk ALSW  | Midpoint | 673 (632-718)    | 9.03 (8.48-9.63) | 1.23 | 9.07 | 0.364                    | 0.17 | 9.24 | 0.95 | 0.20 | 7.45 | 1433 | 20.2 |
|   | KCl                             | MHRW | High Alk ALSW | Probit   | 533 (487-584)    | 7.15 (6.53-7.83) | 1.23 | 7.19 | 0.364                    | 0.17 | 7.37 | 0.16 | 1.80 | 8.30 | 1188 | 17.6 |
|   | NaCl                            | MHRW | Low Alk ALSW  | Probit   | 1860 (1690-2050) | 31.8 (28.9-35.1) | 33.1 | 0.04 | 0.364                    | 0.17 | 32.1 | 0.95 | 0.20 | 7.40 | 3316 | 62.9 |
|   | NaCl                            | MHRW | High Alk ALSW | Probit   | 1970 (1790-2120) | 33.8 (30.6-36.3) | 35.0 | 0.04 | 0.364                    | 0.17 | 34.0 | 0.16 | 1.80 | 8.25 | 3474 | 67.3 |
|   | MgCl <sub>2</sub>               | MHRW | Low Alk ALSW  | Probit   | 899 (784-1008)   | 9.44 (8.23-10.6) | 1.23 | 0.04 | 0.364                    | 9.61 | 19.1 | 0.95 | 0.20 | 7.30 | 2076 | 27.9 |
|   | MgCl <sub>2</sub>               | MHRW | High Alk ALSW | Midpoint | 611 (571-654)    | 6.42 (6.00-6.87) | 1.23 | 0.04 | 0.364                    | 6.59 | 13.0 | 0.16 | 1.80 | 8.25 | 1542 | 21.0 |
|   | Na <sub>2</sub> SO <sub>4</sub> | MHRW | Low Alk ALSW  | Probit   | 2960 (2700-3240) | 20.8 (19.0-22.8) | 42.9 | 0.04 | 0.364                    | 0.17 | 0.22 | 21.8 | 0.20 | 7.45 | 3736 | 56.3 |
|   | Na <sub>2</sub> SO <sub>4</sub> | MHRW | High Alk ALSW | Probit   | 2830 (2560-3130) | 19.9 (18.0-22.0) | 41.0 | 0.04 | 0.364                    | 0.17 | 0.22 | 20.1 | 1.80 | 8.25 | 3481 | 54.9 |

|    |                    |      |                 |          |                  |                  |      |       |                          |      |      |      |      |      |      |      |
|----|--------------------|------|-----------------|----------|------------------|------------------|------|-------|--------------------------|------|------|------|------|------|------|------|
|    | MgSO <sub>4</sub>  | MHRW | Low Alk ALSW    | Midpoint | 2250 (2010-2510) | 18.7 (16.7-20.8) | 1.23 | 0.04  | 0.364                    | 18.8 | 0.22 | 19.6 | 0.20 | 7.30 | 2475 | 28.2 |
|    | MgSO <sub>4</sub>  | MHRW | High Alk ALSW   | Probit   | 2060 (1850-2450) | 17.2 (15.4-20.3) | 1.23 | 0.04  | 0.364                    | 17.3 | 0.22 | 17.3 | 1.80 | 8.20 | 2263 | 27.1 |
|    | MgCl <sub>2</sub>  | MHRW | Low Alk ALSW    | Probit   | 865 (754-985)    | 9.09 (7.92-10.4) | 1.23 | 0.04  | 0.364                    | 9.25 | 18.4 | 0.95 | 0.20 | 7.25 | 1986 | 27.0 |
|    | MgCl <sub>2</sub>  | MHRW | High Alk ALSW   | Probit   | 623 (559-692)    | 6.54 (5.87-7.27) | 1.23 | 0.04  | 0.364                    | 6.71 | 13.3 | 0.16 | 1.80 | 8.10 | 1546 | 21.4 |
| 9  | NaCl               | ALSW | ALSW            | Probit   | 2080 (1890-2280) | 35.5 (32.3-39.1) | 35.8 | 0.04  | 0.364                    | 0.17 | 35.8 | 0.16 | 0.86 | 7.85 | 3342 | 68.9 |
|    | NaCl               | ALSW | Low pH ALSW     | Midpoint | 2160 (1980-2370) | 37.0 (33.9-40.5) | 37.3 | 0.04  | 0.364                    | 0.17 | 37.2 | 0.16 | 0.86 | 6.75 | 3459 | 71.9 |
|    | NaCl               | ALSW | High pH ALSW    | Probit   | 1880 (1730-2050) | 32.2 (29.7-35.0) | 32.5 | 0.04  | 0.364                    | 0.17 | 32.4 | 0.16 | 0.86 | 8.20 | 3116 | 62.7 |
|    | MgCl <sub>2</sub>  | ALSW | ALSW            | Probit   | 938 (841-1090)   | 9.85 (8.83-11.4) | 0.28 | 0.04  | 0.364                    | 10.0 | 19.9 | 0.16 | 0.86 | 7.85 | 2045 | 28.2 |
|    | MgCl <sub>2</sub>  | ALSW | Low pH ALSW     | Probit   | 1040 (894-1230)  | 10.9 (9.39-13.0) | 0.28 | 0.04  | 0.364                    | 11.0 | 22.0 | 0.16 | 0.86 | 6.75 | 2057 | 31.0 |
|    | MgCl <sub>2</sub>  | ALSW | High pH ALSW    | Probit   | 1130 (1040-1280) | 11.9 (10.9-13.4) | 0.28 | 0.04  | 0.364                    | 12.0 | 23.9 | 0.16 | 0.86 | 8.50 | 2257 | 33.2 |
| 10 | KCl                | MHRW | 1.6 Na ALSW     | Probit   | 153 (141-167)    | 2.05 (1.89-2.24) | 0.07 | 2.09  | 0.364                    | 0.17 | 2.09 | 0.16 | 0.86 | 7.95 | 422  | 5.6  |
|    | KCl                | MHRW | 3 Na ALSW       | Probit   | 241 (206-268)    | 3.23 (2.76-3.59) | 0.13 | 3.27  | 0.364                    | 0.17 | 3.34 | 0.16 | 0.86 | 8.00 | 599  | 8.0  |
|    | KCl                | MHRW | 10 Na ALSW      | Midpoint | 393 (360-429)    | 5.27 (4.83-5.75) | 0.43 | 5.31  | 0.364                    | 0.17 | 5.68 | 0.16 | 0.86 | 7.95 | 872  | 12.5 |
|    | KCl                | MHRW | 30 Na ALSW      | Midpoint | 513 (469-560)    | 6.88 (6.29-7.51) | 1.30 | 6.92  | 0.364                    | 0.17 | 8.16 | 0.16 | 0.86 | 7.95 | 1193 | 17.3 |
|    | KCl                | MHRW | 100 Na ALSW     | Midpoint | 644 (602-690)    | 8.64 (8.08-9.26) | 4.35 | 8.68  | 0.364                    | 0.17 | 13.0 | 0.16 | 0.86 | 7.95 | 1656 | 26.4 |
|    | KCl                | MHRW | 300 Na ALSW     | Probit   | 752 (641-1360)   | 10.1 (8.60-18.2) | 13.0 | 10.13 | 0.364                    | 0.17 | 23.1 | 0.16 | 0.86 | 7.90 | 2616 | 45.3 |
| 11 | NaHCO <sub>3</sub> | ALSW | ALSW Aged       | Midpoint | 1660 (1531-1790) | 19.7 (18.2-21.3) | 20.0 | 0.04  | <b>0.134<sup>b</sup></b> | 0.17 | 0.22 | 0.16 | 20.6 | 9.35 | 1670 | 35.5 |
|    | NaHCO <sub>3</sub> | ALSW | 3.0x ALSW Aged  | Midpoint | 1670 (1530-1810) | 19.8 (18.3-21.5) | 20.7 | 0.12  | <b>0.126<sup>b</sup></b> | 0.50 | 0.65 | 0.47 | 22.4 | 9.35 | 1793 | 38.2 |
|    | NaHCO <sub>3</sub> | ALSW | ALSW Fresh      | Probit   | 2150 (1990-2320) | 25.6 (23.7-27.6) | 25.9 | 0.04  | <b>0.207<sup>b</sup></b> | 0.17 | 0.22 | 0.16 | 26.4 | 9.15 | 2087 | 47.2 |
|    | NaHCO <sub>3</sub> | ALSW | 3.0x ALSW Fresh | Midpoint | 2240 (2080-2420) | 26.7 (24.8-28.8) | 27.5 | 0.12  | <b>0.139<sup>b</sup></b> | 0.50 | 0.65 | 0.47 | 29.3 | 9.10 | 2284 | 51.7 |
|    | MgCO <sub>3</sub>  | ALSW | ALSW Aged       | Probit   | 767 (699-843)    | 9.10 (8.29-10.0) | 0.28 | 0.04  | 0.431                    | 9.27 | 0.22 | 0.16 | 19.0 | 9.30 | 1043 | 20.9 |
|    | MgCO <sub>3</sub>  | ALSW | 3.0x ALSW Aged  | Probit   | 507 (467-551)    | 6.01 (5.54-6.54) | 0.85 | 0.12  | <b>0.147<sup>b</sup></b> | 6.52 | 0.65 | 0.47 | 14.6 | 9.30 | 879  | 18.0 |
|    | MgCO <sub>3</sub>  | ALSW | ALSW Fresh      | Midpoint | 792 (736-853)    | 9.39 (8.73-10.1) | 0.28 | 0.04  | 0.433                    | 9.56 | 0.22 | 0.16 | 19.6 | 9.15 | 1054 | 23.8 |
|    | MgCO <sub>3</sub>  | ALSW | 3.0x ALSW Fresh | Probit   | 635 (529-752)    | 7.53 (6.27-8.92) | 0.85 | 0.12  | <b>0.152<sup>b</sup></b> | 8.04 | 0.65 | 0.47 | 17.6 | 9.00 | 941  | 18.4 |
|    | NaCl               | ALSW | ALSW            | Midpoint | 1950 (1840-2070) | 33.4 (31.5-35.5) | 33.7 | 0.04  | 0.364                    | 0.17 | 33.6 | 0.16 | 0.86 | 7.85 | 3296 | 65.0 |

|    |             |      |      |          |                  |      |      |       |      |      |      |      |      |      |      |
|----|-------------|------|------|----------|------------------|------|------|-------|------|------|------|------|------|------|------|
| 12 | Mannitol    | ALSW | ALSW | Probit   | 73.7 (66.2-82.1) | 0.28 | 0.04 | 0.364 | 0.17 | 0.22 | 0.16 | 0.86 | 7.75 |      | 75.7 |
|    | NaGluconate | ALSW | ALSW | Midpoint | 39.2 (36.8-42.0) | 39.5 | 0.04 | 0.364 | 0.17 | 0.22 | 0.16 | 0.86 | 7.85 | 2188 | 76.1 |
|    | CaGluconate | ALSW | ALSW | Probit   | 32.9 (29.9-36.2) | 0.28 | 0.04 | 33.3  | 0.17 | 0.22 | 0.16 | 0.86 | 7.80 | 2074 | 84.6 |
|    | MgGluconate | ALSW | ALSW | Probit   | 17.1 (14.3-18.7) | 0.28 | 0.04 | 0.364 | 17.3 | 0.22 | 0.16 | 0.86 | 7.80 | 1638 | 50.6 |

1019

1020

1021

1022

1023

<sup>a</sup> Ca concentrations are an extrapolation of Ca measurements to LC50 based on model for time dependence of Ca as a function of alkalinity; see Supplemental Material for more information

<sup>b</sup> Ca concentrations are a weighted average of measurements and 24 and 48 hours that bracket the LC50

1024

**SUPPLEMENTAL DATA**

1025 (ETCJ-Feb-16-00107; Mount DM, Erickson RJ, Highland TL, Hoff DJ, Jenson CT, Norberg-King TJ, Peterson KN, Polaske A, Wisniewski S.  
1026 The Acute Toxicity Of Major Ion Salts To *Ceriodaphnia Dubia*: I. Influence Of Background Water Chemistry )

1027 *The concentration- and time- dependence of calcium concentrations in tests of the acute toxicity of NaHCO<sub>3</sub> and MgCO<sub>3</sub> to Ceriodaphnia*  
1028 *dubia*

1029

1030 For tests of the acute toxicity of NaHCO<sub>3</sub>, KHCO<sub>3</sub>, and MgCO<sub>3</sub>, the solubility of calcite was exceeded at the LC50 for the Ca  
1031 concentrations of all dilution waters used. However, significant precipitation of Ca did not always occur, and when it did occur calcite solubility  
1032 was still exceeded at the end of the test. For NaHCO<sub>3</sub>, measurements of [Ca] at the end of tests showed substantial reductions in [Ca] for any  
1033 dilution water with [Ca] at or above 0.35 mM, which includes 1x ALSW, 3x ALSW, MHRW, and ALSW modified to have a higher Ca:Mg ratio,  
1034 but not 1/8x, 1/3x ALSW, or ALSW modified to have a lower Ca:Mg ratio. For MgCO<sub>3</sub>, reductions in [Ca] occurred only for the 3X ALSW  
1035 dilution water ([Ca]≈1.1mM). For KHCO<sub>3</sub>, no reductions in [Ca] occurred (tests were only in ALSW and MHRW and added CO<sub>3</sub> was less than  
1036 for NaHCO<sub>3</sub> due to high K toxicity).

1037

1038 For [Ca] to remain above the level dictated by calcite solubility is not unexpected, given various constraints on precipitation, especially for  
1039 anhydrous, crystalline phases. Nonetheless, to properly evaluate the effects of Ca on salt toxicity requires associating each measured LC50 with  
1040 an appropriate [Ca], and thus requires addressing the time- and concentration-dependence of Ca for those tests in which substantial losses of Ca  
1041 did occur.

1042

1043 Under our standard testing protocol, [Ca] was measured only in (a) the dilution water at the start of the test, (b) the lowest treatment with  
1044 100% mortality at 24 h, and (c) the treatment nearest the LC50 at 48 h. Such sampling is not sufficient to characterize the [Ca] at the measured  
1045 LC50 when [Ca] varies markedly across time and treatments. Consequently, as noted in Methods and Materials section of the main paper, an  
1046 additional 2x2x2 factorial experiment (Table 2, Experimental Set 11) was conducted, which addressed (a) the toxicity of both NaHCO<sub>3</sub> and  
1047 MgCO<sub>3</sub>, (b) in both 1x ALSW and 3x ALSW, and (c) with/without a 2-d aging period before adding test organisms.

1048



1049 In this experiment, additional replicate test chambers for some treatments allowed more intensive monitoring of [Ca] to characterize its  
 1050 dependence on salt concentration and time. Figure S1 shows the dependence of [Ca] on alkalinity and time in these tests. The times indicated on  
 1051 this figure are from test solution preparation, so range from 0 to 2 d for the unaged treatment and 2 to 4 d for the aged treatment.

1052

1053 For the NaHCO<sub>3</sub> tests in 1x ALSW (Figure S1A), loss of Ca increased markedly with both alkalinity and time. Concentrations in the  
 1054 unaged treatment were initially near nominal levels (0.36 mM). During the 1<sup>st</sup> day, significant precipitation did not occur at and below 23 meq/L  
 1055 alkalinity, but [Ca] was reduced 50% and 60% at 36 mM and 45 mM alkalinity, respectively. By the end of the 2<sup>nd</sup> day, precipitation also had  
 1056 occurred at 23 meq/L alkalinity and had increased at the higher alkalinities, with results being very similar for both the unaged and aged  
 1057 treatments. In the aged treatment, substantial precipitation at 11 meq/L alkalinity started on the 3<sup>rd</sup> day and continued during the 4<sup>th</sup> day; for higher  
 1058 alkalinities, some further precipitation occurred during the 3<sup>rd</sup> day, but had essentially stopped by the 4<sup>th</sup>.

1059

1060 For the NaHCO<sub>3</sub> tests in 3x ALSW (Figure S1B), precipitation was even more intense, so that even the “time zero” samples in the unaged  
 1061 treatment showed [Ca] below the nominal value of 1.09 mM. At the end of the 1<sup>st</sup> day, Ca losses ranged from 90% at 45 meq/L alkalinity to 60%  
 1062 at 11 meq/L. At the end of the 2<sup>nd</sup> day, Ca losses were again similar in the aged and unaged treatments, on average ranging from 93% at 45 meq/L  
 1063 alkalinity to 81% at 11 meq/L. The aged treatments showed little additional precipitation during the 3<sup>rd</sup> and 4<sup>th</sup> days at any of the tested  
 1064 alkalinities.

1065

1066 For these NaHCO<sub>3</sub> tests, a 3-parameter exponential relationship was fitted to [Ca] vs alkalinity for both 1 d and 2 d data (solid black lines)  
 1067 using least-squares nonlinear regression, resulting in the following equations:

1068

1069 1 d, 1X ALSW  $[Ca] = 0.134 + 3.33 \cdot e^{-0.120 \cdot \text{Alkalinity}}$

1070

1071 2 d, 1X ALSW  $[Ca] = 0.087 + 1.29 \cdot e^{-0.137 \cdot \text{Alkalinity}}$

1072

1073 1 d, 3X ALSW  $[Ca] = 0.085 + 1.08 \cdot e^{-0.101 \cdot \text{Alkalinity}}$

1074

1075 2 d, 3X ALSW  $[Ca] = 0.045 + 0.28 \cdot e^{-0.050 \cdot \text{Alkalinity}}$

1076

1077 The [Ca] to associate with the LC50s in these tests was calculated as the average of these 1 d and 2d relationships at the alkalinity for the  
1078 LC50. This approximates the average [Ca] at the LC50 during the 2<sup>nd</sup> day of the test. This 2<sup>nd</sup> day average was used rather than an average over  
1079 the whole test because ion toxicity was observed to be very rapid and thus should more reflect the higher toxicity associated with lower [Ca] near  
1080 the end of the test rather than the lower toxicity that would be associated with the initial [Ca].

1081

1082 Using these regression relationships to directly estimate [Ca] in other NaHCO<sub>3</sub> tests is not appropriate because it would assume that  
1083 precipitation was invariant across tests and would ignore the actual [Ca] measurements made in these tests. Rather, a more limited assumption  
1084 was made that these relationships could inform the *relative* difference of [Ca] at one alkalinity to that at another alkalinity. This allowed the actual  
1085 [Ca] measurements in these earlier tests (i.e., at the treatment nearest the LC50 at 2 d and the lowest treatment with 100% mortality at 1 d) to be  
1086 adjusted to the alkalinity of the LC50, and then averaged to estimate a [Ca] to associate with the LC50. The relationships for 1X ALSW (Figure  
1087 S1A) were also used for MHRW and the high Ca:Mg ratio tests, because the [Ca] for these waters were close to that for ALSW. Although this  
1088 procedure entails some uncertainty, the adjustments from the measured [Ca] values were not great; for example, relative to the [Ca] measured at  
1089 test termination in the treatment closest to the LC50, the estimated [Ca] associated with the LC50 was, on average, only 50% higher.

1090

1091 For the MgCO<sub>3</sub> tests in 1x ALSW (Figure S1C), precipitation was negligible across all alkalinities and times, and measured concentrations  
1092 were always near nominal (0.39-0.46 mM). For durations up to 48 h, this was expected based on previous results, and these data extend this  
1093 finding to 96 h. This apparent inhibitory effect of Mg on Ca precipitation (relative to the NaHCO<sub>3</sub> tests) likely reflects the higher solubility of Mg  
1094 and mixed Ca/Mg carbonate minerals, and the effect of  $[Mg] \gg [Ca]$  would thus have on the precipitation of CaCO<sub>3</sub>. Regardless of the specific  
1095 reason, these tests indicated that the nominal [Ca] can be associated with the LC50 for these tests, and confirmed the same conclusion for earlier  
1096 MgCO<sub>3</sub> tests with similar or lower [Ca] in the dilution water.

1097

1098 For the MgCO<sub>3</sub> tests in 3x ALSW (Figure S1D), initial Ca concentrations were near nominal (1.12-1.19 mM) but did show substantial  
1099 losses over the first 2 days of the test. However, this precipitation was anomalous in being greatest at the lowest alkalinity and virtually absent at  
1100 the highest alkalinity. This again suggests an inhibitory effect of Mg that greatly complicates the precipitation of CaCO<sub>3</sub>. Uncertainty and

1101 variability regarding this precipitation are also indicated in Figure S1D by the two-fold disagreement in the measured [Ca] at 2 d for the unaged  
1102 and aged treatments at the lower alkalinities. This precludes any meaningful modeling of these relationships. Within these tests, the [Ca]  
1103 associated with the LC50 was calculated as a weighted average of the 1 d and 2 d [Ca] measurements at concentrations bracketing the LC50. For  
1104 the one earlier test with  $\text{MgCO}_3$  in 3x ALSW, the LC50 corresponded to an alkalinity of about 25 meq/L and the final [Ca] was 0.18 mM at the  
1105 treatment nearest this LC50. Because Figure S1D indicates about a two-fold loss of Ca at this alkalinity from 1 d to 2 d, this measurement was  
1106 increased by 50% to 0.27 mM as an approximate estimate of the [Ca] over the 2<sup>nd</sup> day of the test, and the value to associate with the LC50.  
1107

1108 Figure S1. Relationship of Ca concentration to alkalinity in tests of the acute toxicity of  $\text{NaHCO}_3$  and  $\text{MgCO}_3$  to *Ceriodaphnia dubia*, in both 1X  
 1109 ALSW and 3X ALSW dilution waters and with/without 2-d aging of the test waters. For  $\text{NaHCO}_3$ , solid black lines denote 3-parameter  
 1110 exponential relationship fitted by least-squares regression.  
 1111  
 1112  
 1113  
 1114

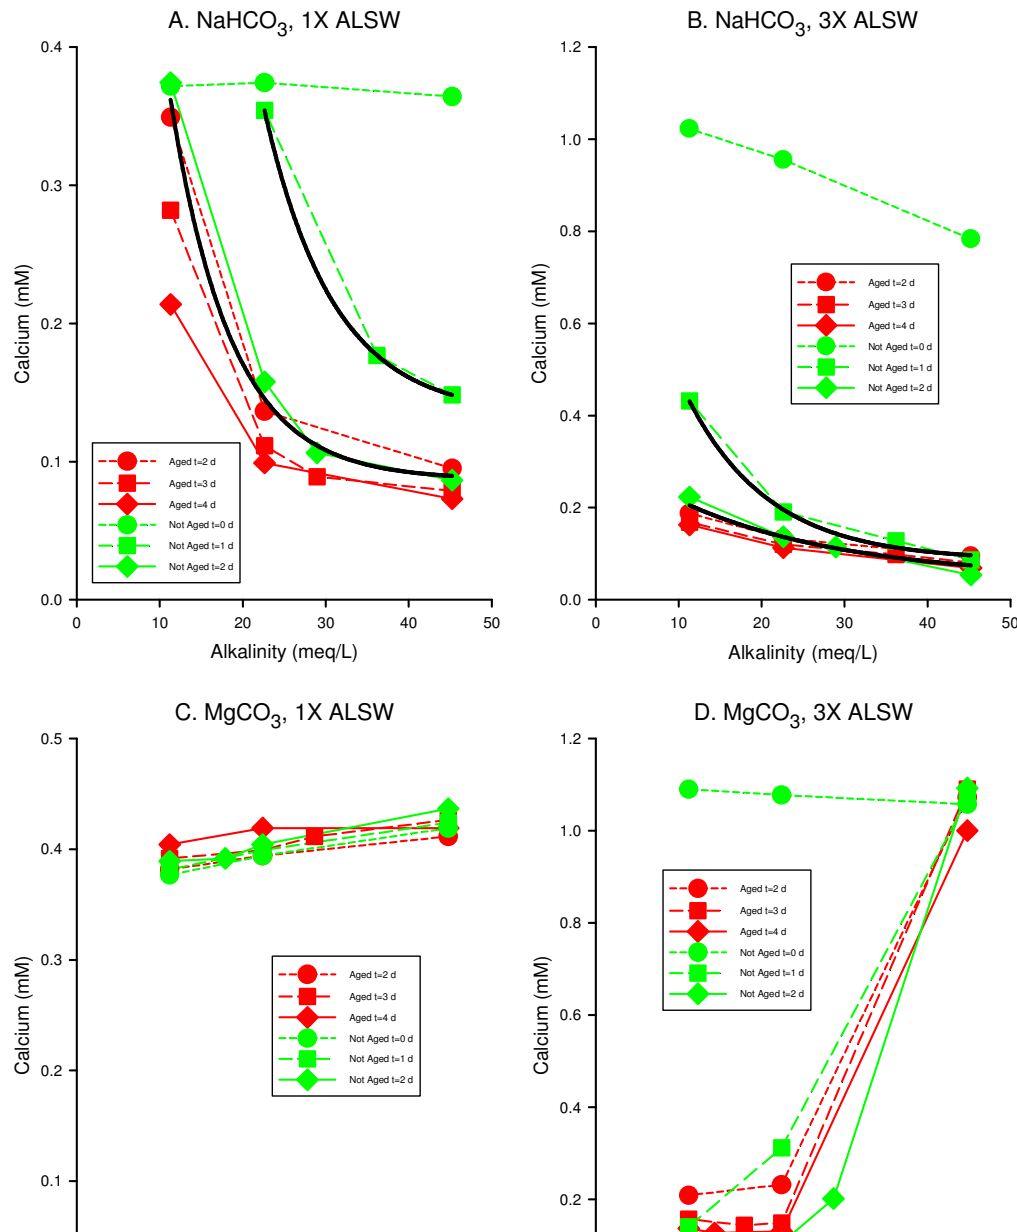

Supplement: NIHMS972055-supplement-supplement_1.pdf [file NIHMS972055-supplement-supplement_1.pdf]
